# Supplementary material for: Variation in Rural African Gut Microbiota Is Strongly Correlated with Colonization by Entamoeba and Subsistence
Source: PLoS Genet. 2015 Nov 30;11(11):e1005658. doi: 10.1371/journal.pgen.1005658 (PMC4664238; doi:10.1371/journal.pgen.1005658)
Supplement: S5 Table — Summary of means and q-values (ANOVA) for all taxa (> = 0.1% in at least 4 individuals) that differ significantly between subsistence groups based on merged (OTUs collapsed based on taxa name) and partially merged (OTUs collapsed based on taxa name restricted to below the family level) OTU tables. Taxa listed at lower resolution exclude those taxa listed at higher resolution. (e.g. if Clostridiaceae and Clostridiaceae Clostridium are both listed, abundances of Clostridiaceae.exclude Clostridium). Taxa highlighted in pink are common both merged and unmerged analyses. Significant q-values (<0.05) for pairwise comparisons between subsistence groups are highlighted in yellow, and the average number of significant pairwise comparisons is reported for each pair of subsistence groups (Fis = Fishing population; Far(S) = Farmers from the South; Far(N) = Farmers from the North; HG = Hunter-gatherers). (XLSX) [file pgen.1005658.s005.xlsx]

## Sheet: Sheet1
Significantly different taxa across subsistence groups
Significant taxa based on merged OTUs	Taxa frequency (%)				q-values
					Overall effect of sub	Pairwise comparisons between subsistence groups
						Fis			Far(S)		Far(N)
	Fis	Far(S)	Far(N)	HG		Far(S)	Far(N)	HG	Far(N)	HG	HG
Actinobacteria Actinobacteria Bifidobacteriales Bifidobacteriaceae Bifidobacterium	0.30	0.01	0.11	0.04	0.000290529	8.77711e-05	0.0156272	7.94104e-07	0.513754	0.286583	0.144253
Actinobacteria Actinobacteria Bifidobacteriales Bifidobacteriaceae Bifidobacterium adolescentis	0.51	0.07	0.00	0.01	0.00800596	0.0551411	0.000533556	0.000499178	0.036206	0.120987	0.316759
Bacteroidetes Bacteroidia Bacteroidales	0.7	3.1	4.6	2.4	0.00252354	0.000251147	8.02249e-05	0.00131933	0.205536	0.510037	0.0758397
Firmicutes Clostridia Clostridiales Clostridiaceae Sarcina	0.00	0.01	0.07	0.69	0.00650472	0.539284	0.171225	7.04535e-05	0.371362	0.000949805	0.0960869
Firmicutes Clostridia Clostridiales Lachnospiraceae Anaerostipes	0.00	0.03	0.20	0.02	0.00618314	5.6911e-05	0.00410876	0.00564991	0.792115	0.1191	0.362813
Firmicutes Clostridia Clostridiales Lachnospiraceae Ruminococcus	0.86	0.81	0.46	0.34	0.0300516	0.796938	0.128804	0.00069758	0.193134	0.0024063	0.30495
Firmicutes Clostridia Clostridiales Lachnospiraceae Ruminococcus gnavus	0.99	0.50	0.41	0.19	0.00618314	0.376468	0.24426	3.53376e-05	0.622117	0.00122616	0.0454734
Firmicutes Clostridia Clostridiales Ruminococcaceae Ruminococcus bromii	0.01	0.15	0.01	0.12	0.000290529	1.3038e-05	0.129633	3.22581e-06	0.051465	0.864836	0.0347278
Percentage of significant pairwise comparisons						0.5	0.5	1	0.125	0.375	0.25
Significant taxa based on partially merged OTUs	Taxa frequency (%)				q-values
					Overall effect of sub	Pairwise comparisons between subsistence groups
						Fis			Far(S)		Far(N)
	Fis	Far(S)	Far(N)	HG		Far(S)	Far(N)	HG	Far(N)	HG	HG
Actinobacteria Actinobacteria Bifidobacteriales Bifidobacteriaceae Bifidobacterium	0.30	0.01	0.11	0.04	0.000647703	8.77711e-05	0.0156272	7.94104e-07	0.513754	0.286583	0.144253
Actinobacteria Actinobacteria Bifidobacteriales Bifidobacteriaceae Bifidobacterium adolescentis	0.51	0.07	0.00	0.01	0.00937042	0.0551411	0.000533556	0.000499178	0.036206	0.120987	0.316759
Bacteroidetes Bacteroidia Bacteroidales	0.1	0.3	2.1	0.5	0.00870093	0.718107	0.000274339	0.0318049	0.000150646	0.0163772	0.025967
Bacteroidetes Bacteroidia Bacteroidales S24-7	0.00	0.01	0.01	0.02	0.0387893	0.0118628	0.00343172	0.00367662	0.287423	0.763202	0.387628
Bacteroidetes Bacteroidia Bacteroidales S24-7	0.02	0.09	0.16	0.21	0.0123488	0.00152417	0.000763252	0.00258714	0.308026	0.75916	0.204525
Bacteroidetes Bacteroidia Bacteroidales S24-7	0.02	0.06	0.14	0.16	0.0387893	0.00733584	0.00299409	0.00682969	0.327589	0.928764	0.28588
Firmicutes Clostridia Clostridiales Clostridiaceae Sarcina	0.00	0.01	0.07	0.69	0.00870093	0.539284	0.171225	7.04535e-05	0.371362	0.000949805	0.0960869
Firmicutes Clostridia Clostridiales	0.02	0.02	0.04	0.06	0.0493367	0.200602	0.0560848	0.000958446	0.343691	0.0461681	0.582044
Firmicutes Clostridia Clostridiales	0.03	0.18	0.03	0.01	0.00792131	0.0692137	0.271398	0.00491584	0.0174564	1.87176e-05	0.324693
Firmicutes Clostridia Clostridiales	0.02	0.01	0.00	0.16	0.0231781	0.88762	0.792496	0.000724917	0.878007	0.00176267	0.024838
Firmicutes Clostridia Clostridiales Lachnospiraceae Anaerostipes	0.00	0.03	0.20	0.02	0.0086154	5.6911e-05	0.00410876	0.00564991	0.792115	0.1191	0.362813
Firmicutes Clostridia Clostridiales Lachnospiraceae Ruminococcus	0.86	0.81	0.46	0.34	0.0251238	0.796938	0.128804	0.00069758	0.193134	0.0024063	0.30495
Firmicutes Clostridia Clostridiales Lachnospiraceae Ruminococcus gnavus	0.99	0.50	0.41	0.19	0.0086154	0.376468	0.24426	3.53376e-05	0.622117	0.00122616	0.0454734
Firmicutes Clostridia Clostridiales Lachnospiraceae	0.30	0.05	0.07	0.07	0.0365613	0.606824	0.924665	0.00113912	0.638019	0.00767375	0.0131342
Firmicutes Clostridia Clostridiales Lachnospiraceae	0.06	0.04	0.05	0.02	0.0158251	0.0601022	0.94119	0.0190452	0.18687	8.21471e-05	0.0754089
Firmicutes Clostridia Clostridiales Lachnospiraceae	0.02	0.06	0.01	0.00	0.00903557	0.370216	0.137535	5.91696e-05	0.421913	0.00195116	0.113328
Firmicutes Clostridia Clostridiales Lachnospiraceae	0.26	0.16	0.09	0.08	0.000647703	0.164952	0.139726	5.41862e-05	0.0153197	6.2647e-07	0.107558
Firmicutes Clostridia Clostridiales Lachnospiraceae	0.89	0.82	0.16	0.10	0.0259138	0.00492625	0.0917674	0.000387759	0.640672	0.496395	0.324306
Firmicutes Clostridia Clostridiales Lachnospiraceae	0.08	0.01	0.01	0.01	0.00103572	0.0353219	0.587654	1.30543e-06	0.29855	0.00390621	0.0015012
	0.00	0.01	0.00	0.14	0.0480736	0.0166734	0.111456	0.000854762	0.819384	0.370325	0.365118
Firmicutes Clostridia Clostridiales Lachnospiraceae	0.28	0.10	0.10	0.03	0.0049801	0.0626578	0.235602	7.14102e-06	0.825204	0.0065501	0.0224613
Firmicutes Clostridia Clostridiales Lachnospiraceae	0.01	0.09	0.06	0.09	0.0387893	0.0244558	0.0282253	0.000577916	0.616555	0.243997	0.713351
Firmicutes Clostridia Clostridiales Lachnospiraceae	0.00	0.02	0.04	0.03	0.0457394	0.00317103	0.0202744	0.617428	0.941724	0.0119276	0.0475294
Firmicutes Clostridia Clostridiales Lachnospiraceae	0.07	0.03	0.00	0.02	0.0163314	0.652917	0.00865895	0.000892977	0.0236308	0.00520785	0.84499
Firmicutes Clostridia Clostridiales Lachnospiraceae	0.47	0.05	0.06	0.03	0.00870093	0.0557487	0.160658	2.46533e-05	0.965037	0.0180117	0.0660874
Firmicutes Clostridia Clostridiales Lachnospiraceae	0.04	0.09	0.04	0.03	0.0165616	0.0037029	0.829705	0.280469	0.0491943	0.000142041	0.321204
Firmicutes Clostridia Clostridiales Lachnospiraceae	0.03	0.10	0.01	0.01	0.0387893	0.270583	0.258546	0.0129496	0.0580548	0.000715653	0.48421
Firmicutes Clostridia Clostridiales Ruminococcaceae Oscillospira	0.27	0.60	0.62	0.51	0.0436818	0.0014047	0.0115427	0.020804	0.930242	0.287407	0.373736
Firmicutes Clostridia Clostridiales Ruminococcaceae Ruminococcus bromii	0.01	0.15	0.01	0.12	0.000647703	1.3038e-05	0.129633	3.22581e-06	0.051465	0.864836	0.0347278
Firmicutes Clostridia Clostridiales Ruminococcaceae	0.00	0.00	0.06	0.13	0.00903557	0.00384759	8.89904e-05	0.025387	0.0621251	0.421457	0.0132785
Firmicutes Clostridia Clostridiales Ruminococcaceae	0.26	0.73	0.56	0.80	0.0165616	0.000355447	0.00666133	0.00582004	0.973971	0.300164	0.455254
Firmicutes Clostridia Clostridiales Ruminococcaceae	0.07	0.27	0.52	0.16	0.00403656	8.62013e-05	0.000345813	0.000485524	0.539472	0.502253	0.259573
Firmicutes Clostridia Clostridiales Ruminococcaceae	0.13	0.51	0.53	0.46	0.0267303	0.00122062	0.00581651	0.00715862	0.763045	0.470671	0.395923
Firmicutes Clostridia Clostridiales Ruminococcaceae	0.02	0.08	0.09	0.08	0.0158251	8.3003e-05	0.0633067	0.0265873	0.21543	0.0453669	0.799618
Firmicutes Clostridia Clostridiales Ruminococcaceae	0.23	0.77	0.89	0.72	0.0457394	0.00321942	0.00652703	0.0148886	0.617869	0.508112	0.31516
Firmicutes Clostridia Clostridiales Ruminococcaceae	0.07	0.35	0.09	0.16	0.0086154	0.6087	0.00860813	0.00139935	0.00355959	0.00043181	0.762312
Firmicutes Clostridia Clostridiales Ruminococcaceae	0.02	0.05	0.10	0.08	0.00811024	0.00381958	7.81165e-05	0.00153568	0.0575464	0.863541	0.0691766
Firmicutes Clostridia Clostridiales Ruminococcaceae	0.07	0.20	0.79	0.23	0.00328936	1.6333e-05	0.000537494	0.00276404	0.894308	0.0951727	0.163694
Firmicutes Clostridia Clostridiales Ruminococcaceae	0.00	0.05	0.03	0.03	0.00903557	0.000869435	0.000312291	0.0141329	0.247811	0.28347	0.0493265
Firmicutes Clostridia Clostridiales Ruminococcaceae	0.01	0.04	0.06	0.02	0.018767	0.000875468	0.00368997	0.0043252	0.703969	0.511892	0.379119
Firmicutes Clostridia Clostridiales Ruminococcaceae	0.4	1.4	1.6	1.3	0.00903557	0.000146845	0.00272938	0.00534967	0.937618	0.204067	0.300257
Firmicutes Clostridia Clostridiales Ruminococcaceae	0.6	2.3	2.0	1.8	0.0485773	0.0110609	0.00815717	0.00416347	0.456257	0.815712	0.55674
Firmicutes Clostridia Clostridiales Ruminococcaceae	0.03	0.10	0.14	0.11	0.0163314	0.0407001	0.00119576	0.000716459	0.0784511	0.189291	0.407913
Firmicutes Clostridia Clostridiales Ruminococcaceae	0.21	0.13	0.04	0.06	0.0457394	0.004078	0.014146	0.0039395	0.7824	0.911194	0.714284
Firmicutes Clostridia Clostridiales Veillonellaceae Veillonella dispar	0.65	0.06	0.10	0.07	0.0480736	0.0112161	0.0652838	0.00112903	0.931755	0.510222	0.560368
Firmicutes Clostridia Clostridiales Veillonellaceae	0.13	0.00	0.41	0.01	0.0457394	0.0704307	0.0262898	0.387924	0.000686394	0.317402	0.00514311
Firmicutes Clostridia Clostridiales Veillonellaceae	0.08	0.29	0.21	0.20	0.0240695	0.000282455	0.0304066	0.0113133	0.508447	0.181441	0.738546
Firmicutes Erysipelotrichi Erysipelotrichales Erysipelotrichaceae p-75-a5	0.1	0.3	0.6	1.7	0.0480736	0.00911417	0.0597728	0.00119047	0.917977	0.572497	0.59666
Proteobacteria Gammaproteobacteria Aeromonadales Succinivibrionaceae Ruminobacter	0.07	0.10	0.02	3.74	0.0480736	0.835336	0.776519	0.0019829	0.900563	0.00532637	0.0453468
Tenericutes Mollicutes RF39	0.00	0.01	0.02	0.03	0.0240695	0.351765	0.00634192	0.0010795	0.0420947	0.0218266	0.723735
Percentage of significant pairwise comparisons						0.6	0.56	0.94	0.18	0.44	0.24
S5 Table. Summary of means and q-values (ANOVA) for all taxa (>= 0.1% in at least 4 individuals) that differ significantly between subsistence groups based on merged (OTUs collapsed based on taxa name) and partially merged (OTUs collapsed based on taxa name restricted to below the family level) OTU tables. Taxa listed at lower resolution exclude those taxa listed at higher resolution. (e.g. if Cl…
